# Supplementary material
Source: publisher figshare collection journal article supplement (https://gsapubs.figshare.com/ndownloader/files/25883742)
Supplement: Supplementary file 1 [file 25883742]

## Sheet: Table
	Dataset S5ba. Campanian (80 to 72 Ma) vegetation ecotypes and mean abundance of angiosperm, fern/moss, and gymnosperm genera for all identifiable specimens.
	Ecotype		Pollen								Leaf
			South				North				South				North
			Genera	Group	Abd. (%)		Genera	Group	Abd. (%)		Genera	Group	Abd. (%)		Genera	Group	Abd. (%)
	Coastal Plain		'''Cingulatisporites'''	2	5.01136		'''Aequitriradites'''	2	4.43756		'''Geonomites'''	1	22.2222		'''Hamamelididae'''	1	33.3333
			'''Mancicorpus'''	1	4.67727		'''Tricolpites'''	1	4.43756		'''Araucaria'''	3	14.8148		'''Araucaria'''	3	16.6667
			'''Tricolpopollenites'''	1	4.51022		'''Tricolpopollenites'''	1	2.95837		'''Laurus'''	1	14.8148		'''Araucarites'''	3	16.6667
			'''Tricolpites'''	1	4.15227		'''Pityosporites'''	3	2.77347		'''Geinitzia'''	3	11.1111		'''Laurus'''	1	16.6667
			'''Concavisporites'''	2	4.00909		'''Mancicorpus'''	1	2.49613		'''Araucarioxylon'''	3	7.40741		'''Phoenocites'''	1	16.6667
			'''Concavissimisporites'''	2	4.00909		'''Alisporites'''	3	2.21878		'''Araucarites'''	3	7.40741
			'''Monosulcites'''	1	3.3409		'''Asterisporites'''	2	2.21878		'''Brachyphyllum'''	3	7.40741
			'''Triporopollenites'''	1	3.3409		'''Beaupreaidites'''	1	2.21878		'''Liriodendron'''	1	7.40741
			'''Laevigatosporites'''	2	2.9157		'''Cingutriletes'''	2	2.21878		'''Williamsonia'''	3	7.40741
			'''Eucommiidites'''	3	2.67272		'''Integricorpus'''	1	2.21878
			'''Balmeisporites'''	3	2.57727		'''Interulobites'''	2	2.21878
			'''Stereisporites'''	2	2.40545		'''Marcellopites'''	1	2.21878
			'''Pityosporites'''	3	2.25511		'''Pentapollenites'''	1	2.21878
			'''Aequitriradites'''	2	2.00454		'''Reticulosporis'''	2	2.21878
			'''Aesculiidites'''	1	2.00454		'''Scabrastephanocolpites'''	1	2.21878
			'''Alisporites'''	3	2.00454		'''Trisolissporites'''	2	2.21878
			'''Araucariacidites'''	3	2.00454		'''Baculatisporites'''	2	1.84898
			'''Araucariacites'''	3	2.00454		'''Seductisporites'''	2	1.84898
			'''Bisaccates'''	3	2.00454		'''Foraminisporis'''	2	1.77502
			'''Camarozonosporites'''	2	2.00454		'''Concavisporites'''	2	1.66408
			'''Chomotriletes'''	2	2.00454		'''Laevigatosporites'''	2	1.60245
			'''Cingulatriletes'''	2	2.00454		'''Stereisporites'''	2	1.58484
			'''Cingutriletes'''	2	2.00454		'''Siberiapollis'''	1	1.47919
			'''Dyadonapites'''	1	2.00454		'''Triporopollenites'''	1	1.47919
			'''Fibulapollis'''	1	2.00454		'''Camarozonosporites'''	2	1.38674
			'''Foraminisporis'''	2	2.00454		'''Aesculiidites'''	1	1.10939
			'''Inundatisporis'''	2	2.00454		'''Araucariacites'''	3	1.10939
			'''Leptolepidites'''	2	2.00454		'''Bisaccates'''	3	1.10939
			'''Navisulcites'''	1	2.00454		'''Cercidiphyllites'''	1	1.10939
			'''Paliurus'''	1	2.00454		'''Cingulatisporites'''	2	1.10939
			'''Polycingulatisporites'''	2	2.00454		'''Conclavipollis'''	1	1.10939
			'''Pseudoplicapollis'''	1	2.00454		'''Droseridites'''	1	1.10939
			'''Psilatricolporites'''	1	2.00454		'''Dyadonapites'''	1	1.10939
			'''Raistrickia'''	2	2.00454		'''Eucommiidites'''	3	1.10939
			'''Rugubivesiculites'''	3	2.00454		'''Expressipollis'''	1	1.10939
			'''Siberiapollis'''	1	2.00454		'''Fibulapollis'''	1	1.10939
			'''Simpsonipollis'''	1	2.00454		'''Grewipollenites'''	1	1.10939
			'''Sindorapollis'''	1	2.00454		'''Gunnaripollis'''	1	1.10939
			'''Trilobosporites'''	2	2.00454		'''Hannisporis'''	2	1.10939
			'''Umbosporites'''	2	2.00454		'''Leptolepidites'''	2	1.10939
							'''Penetetrapites'''	1	1.10939
							'''Phimopollenites'''	1	1.10939
							'''Pistillipollenites'''	1	1.10939
							'''Plicapollis'''	1	1.10939
							'''Polycingulatisporites'''	2	1.10939
							'''Pristinuspollenites'''	3	1.10939
							'''Psilatricolpites'''	1	1.10939
							'''Psilatricolporites'''	1	1.10939
							'''Raistrickia'''	2	1.10939
							'''Retitricolpites'''	1	1.10939
							'''Rugubivesiculites'''	3	1.10939
							'''Santalacites'''	1	1.10939
							'''Senipites'''	1	1.10939
							'''Sindorapollis'''	1	1.10939
							'''Stereigranisporis'''	2	1.10939
							'''Stoverisporites'''	2	1.10939
							'''Toroisporis'''	2	1.10939
							'''Trifossapollenites'''	3	1.10939
							'''Trilobapollis'''	1	1.10939
							'''Tschudypollis'''	1	1.10939
							'''Umbosporites'''	2	1.10939
							'''Weylandipollis'''	1	1.10939
	Estuarine or Aquatic		'''Azolla'''	2	12.5		'''Stenozonotriletes'''	2	27.2727		'''Nelumbo'''	1	18.75		'''Nelumbo'''	1	25
			'''Azollopsis'''	2	12.5		'''Echinatisporis'''	2	18.1818		'''Trapa'''	1	18.75		'''Pistia'''	1	25
			'''Echinatispora'''	2	12.5		'''Azolla'''	2	13.6364		'''Castalia'''	1	12.5		'''Quereuxia'''	1	25
			'''Echinatisporis'''	2	12.5		'''Foveotricolporites'''	1	13.6364		'''Heteranthera'''	1	12.5		'''Salvinia'''	2	25
			'''Foveotriletes'''	2	12.5		'''Foveotriletes'''	2	13.6364		'''Marsilea'''	2	12.5
			'''Fraxinoipollenites'''	1	12.5		'''Fraxinoipollenites'''	1	13.6364		'''Ottelia'''	1	12.5
			'''Parazolla'''	2	12.5						'''Pistia'''	1	12.5
			'''Stenozonotriletes'''	2	12.5
	Open Scrubland		'''Mohria'''	2	27.5862		'''Lusatisporis'''	2	34.4828						'''Pistacia'''	1	100
			'''Ephedripites'''	3	17.2414		'''Equisetosporites'''	2	31.0345
			'''Ephedra'''	3	13.7931		'''Ephedra'''	3	17.2414
			'''Equisetosporites'''	2	13.7931		'''Tetracolpites'''	1	17.2414
			'''Tetracolpites'''	1	13.7931
			'''Tetracolporopollenites'''	1	13.7931
	Swampy or Lagoonal		'''Leiotriletes'''	2	7.44087		'''Cirratriradites'''	2	8.75912		'''Sabalites'''	1	62.5		'''Rhizopalmoxylon'''	1	100
			'''Punctatosporites'''	2	7.44087		'''Translucentipollis'''	1	8.75912		'''Glyptostrobus'''	3	37.5
			'''Rhoipites'''	1	5.58065		'''Zlivisporis'''	2	7.66423
			'''Sphagnum'''	2	5.58065		'''Accuratipollis'''	1	6.56934
			'''Gleicheniidites'''	2	5.31491		'''Gleicheniidites'''	2	5.83942
			'''Cupuliferoidaepollenites'''	1	4.65054		'''Pulcheripollenites'''	1	5.47445
			'''Arecipites'''	1	4.46452		'''Acanthotriletes'''	2	4.37956
			'''Acanthotriletes'''	2	3.72044		'''Arecipites'''	1	4.37956
			'''Cirratriradites'''	2	3.72044		'''Complexiopollis'''	1	4.37956
			'''Cupuliferoipollenites'''	1	3.72044		'''Cupuliferoidaepollenites'''	1	4.37956
			'''Extratriporopollenites'''	1	3.72044		'''Cupuliferoipollenites'''	1	4.37956
			'''Ghoshispora'''	2	3.72044		'''Cyrilla'''	1	4.37956
			'''Hymenophyllumsporites'''	2	3.72044		'''Ghoshispora'''	2	4.37956
			'''Hymenozonotriletes'''	2	3.72044		'''Gleichenites'''	2	4.37956
			'''Intertriletes'''	2	3.72044		'''Orbiculapollis'''	1	4.37956
			'''Laricoidites'''	3	3.72044		'''Pandaniidites'''	1	4.37956
			'''Latipollis'''	1	3.72044		'''Sparganiaceaepollenites'''	1	4.37956
			'''Pandaniidites'''	1	3.72044		'''Spermatites'''	3	4.37956
			'''Peromonolites'''	2	3.72044		'''Vitis'''	1	4.37956
			'''Pulcheripollenites'''	1	3.72044
			'''Punctatisporites'''	2	3.72044
			'''Sphagnumsporites'''	2	3.72044
			'''Zlivisporis'''	2	3.72044
	Temperate Lowland Forest		'''Betula'''	1	5.36633		'''Aquilapollenites'''	1	9.26743		'''Platanus'''	1	9.38967		'''Carpites'''	1	10.4046		54.2097	51.4451
			'''Matonisporites'''	2	5.36633		'''Liliacidites'''	1	3.5041		'''Protophyllocladus'''	2	9.38967		'''Platanaceae'''	1	6.93642
			'''Tricolporopollenites'''	1	4.69554		'''Cibotiumspora'''	2	3.31968		'''Cornus'''	1	7.51174		'''Rhamnus'''	1	6.93642
			'''Aquilapollenites'''	1	4.02474		'''Cicatricosisporites'''	2	2.48976		'''Dryophyllum'''	1	5.00782		'''Sequoia'''	3	5.20231
			'''Momipites'''	1	4.02474		'''Cranwellia'''	1	2.21312		'''Viburnum'''	1	4.13146		'''Platanus'''	1	4.62428
			'''Inaperturopollenites'''	3	3.01856		'''Heliosporites'''	2	2.21312		'''Apocynophyllum'''	1	3.75587		'''Aceraceae'''	1	3.46821
			'''Carya'''	1	2.68316		'''Ischyosporites'''	2	2.21312		'''Carpites'''	1	3.75587		'''Canna'''	1	3.46821
			'''Pinus'''	3	2.68316		'''Lycopodiacidites'''	2	2.21312		'''Dryopteris'''	2	3.75587		'''Carya'''	1	3.46821
			'''Podocarpites'''	3	2.68316		'''Podocarpidites'''	3	2.21312		'''Moriconia'''	3	3.75587		'''Cupressinoxylon'''	3	3.46821
			'''Podocarpus'''	3	2.68316		'''Todisporites'''	2	2.21312		'''Podozamites'''	3	3.75587		'''Cyparissidium'''	3	3.46821
			'''Polypodiumsporites'''	2	2.68316		'''Triporoletes'''	2	2.21312		'''Sequoia'''	3	3.28638		'''Dryophyllum'''	1	3.46821
			'''Tricolporapollenites'''	1	2.68316		'''Cyathidites'''	2	2.02869		'''Cercidiphyllum'''	1	3.12989		'''Elatocladus'''	3	3.46821
			'''Liliacidites'''	1	1.93784		'''Foveosporites'''	2	1.84426		'''Cunninghamites'''	3	3.12989		'''Grewiopsis'''	1	3.46821
			'''Appendicisporites'''	2	1.78878		'''Trudopollis'''	1	1.84426		'''Salix'''	1	3.00469		'''Juglans'''	1	3.46821
			'''Cicatricosisporites'''	2	1.67698		'''Tricolporites'''	1	1.47541		'''Osmunda'''	2	2.8169		'''Osmunda'''	2	3.46821
			'''Cyathidites'''	2	1.67698		'''Taxodiaceaepollenites'''	3	1.42272		'''Quercus'''	1	2.25352		'''Platanophyllum'''	1	3.46821
			'''Corollina'''	3	1.6099		'''Osmundacidites'''	2	1.3832		'''Betulites'''	1	1.87793		'''Plicatophyllum'''	1	3.46821
			'''Tricolporites'''	1	1.6099		'''Erdtmanipollis'''	1	1.32787		'''Canna'''	1	1.87793		'''Podozamites'''	3	3.46821
			'''Taxodiaceaepollenites'''	3	1.49065		'''Polypodiisporites'''	2	1.32787		'''Dammara'''	3	1.87793		'''Quercophyllum'''	1	3.46821
			'''Betulaceoipollenites'''	1	1.34158		'''Vitreisporites'''	3	1.26464		'''Ginkgo'''	3	1.87793		'''Quercus'''	1	3.46821
			'''Biretisporites'''	2	1.34158		'''Acer'''	1	1.10656		'''Gleichenites'''	2	1.87793		'''Salix'''	1	3.46821
			'''Classopollis'''	3	1.34158		'''Appendicisporites'''	2	1.10656		'''Grewiopsis'''	1	1.87793		'''Viburnum'''	1	3.46821
			'''Cranwellia'''	1	1.34158		'''Betulaceoipollenites'''	1	1.10656		'''Juglans'''	1	1.87793		'''Vitis'''	1	3.46821
			'''Deltoidospora'''	2	1.34158		'''Biretisporites'''	2	1.10656		'''Pinus'''	3	1.87793		'''Woodwardia'''	2	3.46821
			'''Erdtmanipollis'''	1	1.34158		'''Caryapollenites'''	1	1.10656		'''Podogonium'''	1	1.87793
			'''Exesipollenites'''	3	1.34158		'''Classopollis'''	3	1.10656		'''Rhamnus'''	1	1.87793
			'''Foveasporis'''	2	1.34158		'''Corollina'''	3	1.10656		'''Rhus'''	1	1.87793
			'''Foveosporites'''	2	1.34158		'''Deltoidospora'''	2	1.10656		'''Ribes'''	1	1.87793
			'''Granulatisporites'''	2	1.34158		'''Hamulatisporis'''	2	1.10656		'''Thuja'''	3	1.87793
			'''Hamulatisporis'''	2	1.34158		'''Ilexpollenites'''	1	1.10656		'''Vitis'''	1	1.87793
			'''Ilexpollenites'''	1	1.34158		'''Inaperturates'''	3	1.10656		'''Woodwardia'''	2	1.87793
			'''Inaperturates'''	3	1.34158		'''Inaperturopollenites'''	3	1.10656
			'''Kurtzipites'''	1	1.34158		'''Inaperturotetradites'''	1	1.10656
			'''Lycopodiacidites'''	2	1.34158		'''Kurtzipites'''	1	1.10656
			'''Microfoveolatosporis'''	2	1.34158		'''Liburnisporites'''	1	1.10656
			'''Nudopollis'''	1	1.34158		'''Lygistepollenites'''	3	1.10656
			'''Osmundacidites'''	2	1.34158		'''Microfoveolatosporis'''	2	1.10656
			'''Periporopollenites'''	1	1.34158		'''Minorpollis'''	1	1.10656
			'''Phyllocladidites'''	3	1.34158		'''Momipites'''	1	1.10656
			'''Podocarpidites'''	3	1.34158		'''Multinodisporites'''	2	1.10656
			'''Polypodiidites'''	2	1.34158		'''Parvisaccites'''	3	1.10656
			'''Polypodiisporites'''	2	1.34158		'''Periporopollenites'''	1	1.10656
			'''Polyporina'''	1	1.34158		'''Phyllocladidites'''	3	1.10656
			'''Projectoporites'''	1	1.34158		'''Pilosisporites'''	2	1.10656
			'''Subtriporopollenites'''	1	1.34158		'''Polypodiidites'''	2	1.10656
			'''Thomsonipollis'''	1	1.34158		'''Polyporina'''	1	1.10656
			'''Tilia'''	1	1.34158		'''Protoquercus'''	1	1.10656
			'''Tricolpites'''	1	1.34158		'''Quercoidites'''	1	1.10656
			'''Triletes'''	2	1.34158		'''Quercus'''	1	1.10656
			'''Trudopollis'''	1	1.34158		'''Rogalskaisporites'''	2	1.10656
			'''Tsugaepollenites'''	3	1.34158		'''Rugulatisporites'''	2	1.10656
			'''Ulmipollenites'''	1	1.34158		'''Sequoiapollenites'''	3	1.10656
			'''Vitreisporites'''	3	1.34158		'''Striatopollis'''	1	1.10656
							'''Subtriporopollenites'''	1	1.10656
							'''Taurocusporites'''	2	1.10656
							'''Tilia'''	1	1.10656
							'''Triatriopollenites'''	1	1.10656
							'''Tricolporopollenites'''	1	1.10656
							'''Triletes'''	2	1.10656
							'''Trilites'''	2	1.10656
							'''Triquitrites'''	2	1.10656
							'''Trivestibulopollenites'''	1	1.10656
							'''Ulmipollenites'''	1	1.10656
							'''Verrutricolpites'''	1	1.10656
							'''Verrutricolporites'''	1	1.10656
							'''Verrutriporites'''	1	1.10656
							'''Zonalapollenites'''	3	1.10656
	Tropical Lowland Forest		'''Monocolpopollenites'''	1	16.2162		'''Distaltriangulisporites'''	2	6.09137		'''Ficus'''	1	11.4349		'''Laurophyllum'''	1	9.13706
			'''Entylissa'''	3	10.8108		'''Gnetaceaepollenites'''	3	6.09137		'''Manihotites'''	1	7.53033		'''Ficus'''	1	7.1066
			'''Cycadopites'''	3	8.10811		'''Plicatella'''	2	6.09137		'''Rhamnites'''	1	7.53033		'''Asplenium'''	2	6.09137
			'''Alsophilidites'''	2	5.40541		'''Verrucatosporites'''	2	6.09137		'''Asplenium'''	2	5.02022		'''Laurales'''	1	6.09137
			'''Ceratosporites'''	2	5.40541		'''Cycadopites'''	3	4.56853		'''Laurophyllum'''	1	5.02022		'''Leguminosites'''	1	6.09137
			'''Kuylisporites'''	2	5.40541		'''Quadripollis'''	1	4.06091		'''Menispermum'''	1	5.02022		'''Myrtophyllum'''	1	4.56853
			'''Loranthacites'''	1	5.40541		'''Alsophilidites'''	2	3.04569		'''Selaginella'''	2	5.02022		'''Celastrinites'''	1	3.04569
			'''Lygodiosporites'''	2	5.40541		'''Anacolosidites'''	1	3.04569		'''Myrtophyllum'''	1	3.76517		'''Celastrus'''	1	3.04569
			'''Lygodiumsporites'''	2	5.40541		'''Anemia'''	2	3.04569		'''Anemia'''	2	3.34681		'''Cinnamomum'''	1	3.04569
			'''Palmaepollenites'''	1	5.40541		'''Ceratosporites'''	2	3.04569		'''Pterospermites'''	1	3.13764		'''Cladophlebis'''	2	3.04569
			'''Quadrapollenites'''	1	5.40541		'''Cycadophytus'''	3	3.04569		'''Cinnamomum'''	1	3.01213		'''Cornophyllum'''	1	3.04569
			'''Senftenbergia'''	1	5.40541		'''Hemitelia'''	2	3.04569		'''Anona'''	1	2.51011		'''Cyathea'''	2	3.04569
			'''Syncolporopollenites'''	1	5.40541		'''Klukisporites'''	2	3.04569		'''Aristolochites'''	1	2.51011		'''Dennstaedtia'''	2	3.04569
			'''Triplanosporites'''	2	5.40541		'''Kuylisporites'''	2	3.04569		'''Asimina'''	1	2.51011		'''Dillenites'''	1	3.04569
			'''Undulatisporites'''	2	5.40541		'''Loranthacites'''	1	3.04569		'''Asplenites'''	2	2.51011		'''Ebenales'''	1	3.04569
							'''Myrtaceoipollenites'''	1	3.04569		'''Celastrinites'''	1	2.51011		'''Eodicranopteris'''	2	3.04569
							'''Neoraistrickia'''	2	3.04569		'''Celastrus'''	1	2.51011		'''Magnifolia'''	1	3.04569
							'''Phaseoliidites'''	1	3.04569		'''Cyathea'''	2	2.51011		'''Marchantities'''	2	3.04569
							'''Quadrapollenites'''	1	3.04569		'''Diospyros'''	1	2.51011		'''Menispermites'''	1	3.04569
							'''Rousea'''	1	3.04569		'''Leguminosites'''	1	2.51011		'''Palmoxylon'''	1	3.04569
							'''Ruffordiaspora'''	2	3.04569		'''Magnolia'''	1	2.51011		'''Piperales'''	1	3.04569
							'''Schizaea'''	2	3.04569		'''Magnoliophyllum'''	1	2.51011		'''Pterospermites'''	1	3.04569
							'''Symplocoipollenites'''	1	3.04569		'''Malapoenna'''	1	2.51011		'''Thelypteris'''	2	3.04569
							'''Syncolporites'''	1	3.04569		'''Menispermites'''	1	2.51011		'''Trimeniaceae'''	1	3.04569
							'''Triplanosporites'''	2	3.04569		'''Sapindus'''	1	2.51011		'''Trochodendrales'''	1	3.04569
							'''Undulatisporites'''	2	3.04569		'''Zamites'''	3	2.51011		'''Zizyphus'''	1	3.04569
							'''Varirugosisporites'''	2	3.04569		'''Zizyphus'''	1	2.51011
							'''Verrucosisporites'''	2	3.04569
	Upland Forest		'''Lycopodium'''	2	19.1489		'''Retitriletes'''	2	19.1489		'''Cissus'''	1	40		'''Cissus'''	1	100
			'''Lycopodiumsporites'''	2	17.0213		'''Cedripites'''	3	10.6383		'''Lycopodium'''	2	20
			'''Abietineaepollenites'''	3	12.766		'''Abietineaepollenites'''	3	6.38298		'''Widdringtonia'''	3	20
			'''Piceaepollenites'''	3	12.766		'''Callialasporites'''	3	6.38298		'''Widdringtonites'''	3	20
			'''Reticulatasporites'''	2	12.766		'''Clavatisporites'''	2	6.38298
			'''Reticuloidosporites'''	2	12.766		'''Lycopodiumsporites'''	2	6.38298
			'''Sestrosporites'''	2	12.766		'''Minorpollis'''	1	6.38298
							'''Ornamentifera'''	2	6.38298
							'''Piceites'''	3	6.38298
							'''Pleurospermaepollenites'''	1	6.38298
							'''Reticulisporites'''	2	6.38298
							'''Rosannia'''	1	6.38298
							'''Sestrosporites'''	2	6.38298
	Wet or Successional		'''Alnipollenites'''	1	19.5122		'''Alnipollenites'''	1	7.69231		'''Onoclea'''	2	24		'''Diacrophyllum'''	1	50
			'''Cupanieidites'''	1	12.1951		'''Alnus'''	1	7.69231		'''Populus'''	1	24		'''Cyperacites'''	1	10
			'''Calamospora'''	2	9.7561		'''Cupanieidites'''	1	7.69231		'''Cyperacites'''	1	16		'''Equisetum'''	2	10
			'''Ericaceoipollenites'''	1	9.7561		'''Engelhardtia'''	1	7.69231		'''Colutea'''	1	12		'''Hepaticites'''	2	10
			'''Gabonisporis'''	2	9.7561		'''Engelhardtioidites'''	1	7.69231		'''Eriocaulon'''	1	12		'''Onoclea'''	2	10
			'''Microreticulatisporites'''	2	9.7561		'''Ericaceoipollenites'''	1	7.69231		'''Myrica'''	1	12		'''Sparganium'''	1	10
			'''Nevesisporites'''	2	9.7561		'''Ericipites'''	1	7.69231
			'''Nyssapollenites'''	1	9.7561		'''Gabonisporis'''	2	7.69231
			'''Sporopollis'''	1	9.7561		'''Microreticulatisporites'''	2	7.69231
							'''Nyssa'''	1	7.69231
							'''Nyssoidites'''	1	7.69231
							'''Salixipollenites'''	1	7.69231
							'''Sporopollis'''	1	7.69231
	Dataset S5bb. Early Maastrichtian (78 to 69 Ma) vegetation ecotypes and mean abundance of angiosperm, fern/moss, and gymnosperm genera for all identifiable specimens.
	Ecotype		Pollen								Leaf
			South				North				South				North
			Genera	Group	Abd. (%)		Genera	Group	Abd. (%)		Genera	Group	Abd. (%)		Genera	Group	Abd. (%)
	Coastal Plain		'''Mancicorpus'''	1	3.49503		'''Tricolpites'''	1	5.72704		'''Araucaria'''	3	25		'''Brachyphyllum'''	3	16.6667
			'''Tricolpites'''	1	2.58095		'''Tricolpopollenites'''	1	5.11343		'''Laurus'''	1	25		'''Hamamelidales'''	1	16.6667
			'''Tricolpopollenites'''	1	2.51642		'''Aequitriradites'''	2	4.09074		'''Araucarites'''	3	16.6667		'''Liriodendrites'''	1	16.6667
			'''Aequitriradites'''	2	2.35915		'''Seductisporites'''	2	4.09074		'''Brachyphyllum'''	3	16.6667		'''Liriodendron'''	1	16.6667
			'''Cingulatisporites'''	2	2.35915		'''Trisolissporites'''	2	4.09074		'''Phoenocites'''	1	16.6667		'''Macclintockia'''	1	16.6667
			'''Alisporites'''	3	2.09702		'''Pityosporites'''	3	3.74985						'''Williamsonia'''	3	16.6667
			'''Asterisporites'''	2	2.09702		'''Alisporites'''	3	3.40895
			'''Baculatisporites'''	2	2.09702		'''Mancicorpus'''	1	3.06806
			'''Concavisporites'''	2	2.09702		'''Triporopollenites'''	1	3.06806
			'''Concavissimisporites'''	2	2.09702		'''Laevigatosporites'''	2	2.23131
			'''Integricorpus'''	1	2.09702		'''Aesculiidites'''	1	2.04537
			'''Interulobites'''	2	2.09702		'''Araucariacites'''	3	2.04537
			'''Marcellopites'''	1	2.09702		'''Baculatisporites'''	2	2.04537
			'''Pentapollenites'''	1	2.09702		'''Balmeisporites'''	3	2.04537
			'''Reticulosporis'''	2	2.09702		'''Bisaccates'''	3	2.04537
			'''Scabrastephanocolpites'''	1	2.09702		'''Camarozonosporites'''	2	2.04537
			'''Laevigatosporites'''	2	1.83489		'''Cingulatisporites'''	2	2.04537
			'''Monosulcites'''	1	1.79745		'''Concavisporites'''	2	2.04537
			'''Foraminisporis'''	2	1.67762		'''Conclavipollis'''	1	2.04537
			'''Stereisporites'''	2	1.64766		'''Densoisporites'''	2	2.04537
			'''Beaupreaidites'''	1	1.57276		'''Droseridites'''	1	2.04537
			'''Siberiapollis'''	1	1.57276		'''Dyadonapites'''	1	2.04537
			'''Triporopollenites'''	1	1.57276		'''Eucommiidites'''	3	2.04537
			'''Camarozonosporites'''	2	1.46791		'''Fibulapollis'''	1	2.04537
			'''Balmeisporites'''	3	1.39801		'''Foraminisporis'''	2	2.04537
			'''Cingutriletes'''	2	1.39801		'''Grewipollenites'''	1	2.04537
			'''Pityosporites'''	3	1.39801		'''Leptolepidites'''	2	2.04537
			'''Eucommiidites'''	3	1.1983		'''Marcellopites'''	1	2.04537
			'''Aesculiidites'''	1	1.04851		'''Monosulcites'''	3	2.04537
			'''Araucariacidites'''	3	1.04851		'''Pistillipollenites'''	1	2.04537
			'''Araucariacites'''	3	1.04851		'''Plicapollis'''	1	2.04537
			'''Callistopollenites'''	1	1.04851		'''Polycingulatisporites'''	2	2.04537
			'''Cercidiphyllites'''	1	1.04851		'''Pristinuspollenites'''	3	2.04537
			'''Chomotriletes'''	2	1.04851		'''Raistrickia'''	2	2.04537
			'''Cingulatriletes'''	2	1.04851		'''Rugubivesiculites'''	3	2.04537
			'''Droseridites'''	1	1.04851		'''Siberiapollis'''	1	2.04537
			'''Expressipollis'''	1	1.04851		'''Sindorapollis'''	1	2.04537
			'''Fibulapollis'''	1	1.04851		'''Stereisporites'''	2	2.04537
			'''Grewipollenites'''	1	1.04851		'''Toroisporis'''	2	2.04537
			'''Gunnaripollis'''	1	1.04851		'''Umbosporites'''	2	2.04537
			'''Hannisporis'''	2	1.04851
			'''Inundatisporis'''	2	1.04851
			'''Leptolepidites'''	2	1.04851
			'''Leschikisporis'''	2	1.04851
			'''Navisulcites'''	1	1.04851
			'''Paliurus'''	1	1.04851
			'''Penetetrapites'''	1	1.04851
			'''Phimopollenites'''	1	1.04851
			'''Pistillipollenites'''	1	1.04851
			'''Polycingulatisporites'''	2	1.04851
			'''Pristinuspollenites'''	3	1.04851
			'''Pseudoplicapollis'''	1	1.04851
			'''Psilatricolpites'''	1	1.04851
			'''Psilatricolporites'''	1	1.04851
			'''Raistrickia'''	2	1.04851
			'''Retitricolpites'''	1	1.04851
			'''Rugubivesiculites'''	3	1.04851
			'''Sabalpollenites'''	1	1.04851
			'''Santalacites'''	1	1.04851
			'''Seductisporites'''	2	1.04851
			'''Senipites'''	1	1.04851
			'''Simpsonipollis'''	1	1.04851
			'''Sindorapollis'''	1	1.04851
			'''Stereigranisporis'''	2	1.04851
			'''Stoverisporites'''	2	1.04851
			'''Trifossapollenites'''	3	1.04851
			'''Trilobapollis'''	1	1.04851
			'''Trilobosporites'''	2	1.04851
			'''Tschudypollis'''	1	1.04851
			'''Umbosporites'''	2	1.04851
			'''Weylandipollis'''	1	1.04851
	Estuarine or Aquatic		'''Stenozonotriletes'''	2	14.0625		'''Azolla'''	2	33.3333		'''Trapa'''	1	20		'''Castalia'''	1	25
			'''Echinatisporis'''	2	10.9375		'''Echinatisporis'''	2	33.3333		'''Castanea'''	1	10		'''Paranymphaea'''	1	25
			'''Azolla'''	2	9.375		'''Fraxinoipollenites'''	1	33.3333		'''Heteranthera'''	1	10		'''Pistia'''	1	25
			'''Azollopsis'''	2	9.375						'''Lemna'''	1	10		'''Trapa'''	1	25
			'''Echinatispora'''	2	9.375						'''Nelumbo'''	1	10
			'''Foveotricolporites'''	1	9.375						'''Phragmites'''	1	10
			'''Foveotriletes'''	2	9.375						'''Pistia'''	1	10
			'''Fraxinoipollenites'''	1	9.375						'''Salvinia'''	2	10
			'''Parazolla'''	2	9.375						'''Scirpus'''	1	10
			'''Zonosulcites'''	1	9.375
	Open Scrubland		'''Equisetosporites'''	2	40.9836		'''Mohria'''	2	50		'''Paliurus'''	1	50
			'''Lusatisporis'''	2	16.3934		'''Ephedra'''	3	25		'''Pistacia'''	1	50
			'''Ephedripites'''	3	9.83607		'''Equisetosporites'''	2	25
			'''Ephedra'''	3	8.19672
			'''Monoporopollenites'''	1	8.19672
			'''Tetracolpites'''	1	8.19672
			'''Tetracolporopollenites'''	1	8.19672
	Swampy or Lagoonal		'''Pulcheripollenites'''	1	6.19835		'''Sphagnum'''	2	13.3333		'''Sabalites'''	1	50		'''Glyptostrobus'''	3	100
			'''Accuratipollis'''	1	4.95868		'''Accuratipollis'''	1	6.66667		'''Glyptostrobus'''	3	25
			'''Leiotriletes'''	2	4.95868		'''Arecipites'''	1	6.66667		'''Rhizopalmoxylon'''	1	25
			'''Punctatosporites'''	2	4.95868		'''Cupuliferoidaepollenites'''	1	6.66667
			'''Sphagnumsporites'''	2	4.95868		'''Cupuliferoipollenites'''	1	6.66667
			'''Translucentipollis'''	1	4.95868		'''Cyrilla'''	1	6.66667
			'''Gleicheniidites'''	2	4.33884		'''Ghoshispora'''	2	6.66667
			'''Cirratriradites'''	2	3.71901		'''Gleicheniidites'''	2	6.66667
			'''Rhoipites'''	1	3.71901		'''Pandaniidites'''	1	6.66667
			'''Zlivisporis'''	2	3.71901		'''Pulcheripollenites'''	1	6.66667
			'''Cupuliferoidaepollenites'''	1	3.30579		'''Punctatisporites'''	2	6.66667
			'''Arecipites'''	1	3.09917		'''Spermatites'''	3	6.66667
			'''Acanthotriletes'''	2	2.47934		'''Vitis'''	1	6.66667
			'''Ailanthipites'''	1	2.47934		'''Zlivisporis'''	2	6.66667
			'''Cupuliferoipollenites'''	1	2.47934
			'''Extratriporopollenites'''	1	2.47934
			'''Ghoshispora'''	2	2.47934
			'''Gleichenites'''	2	2.47934
			'''Hymenophyllumsporites'''	2	2.47934
			'''Hymenozonotriletes'''	2	2.47934
			'''Intertriletes'''	2	2.47934
			'''Laricoidites'''	3	2.47934
			'''Latipollis'''	1	2.47934
			'''Marattisporites'''	2	2.47934
			'''Orbiculapollis'''	1	2.47934
			'''Pandaniidites'''	1	2.47934
			'''Peromonolites'''	2	2.47934
			'''Singhia'''	3	2.47934
			'''Sparganiaceaepollenites'''	1	2.47934
			'''Sphagnum'''	2	2.47934
			'''Wodehouseia'''	1	2.47934
	Temperate Lowland Forest		'''Aquilapollenites'''	1	5.79082		'''Aquilapollenites'''	1	6.93551		'''Carpites'''	1	6.71355		'''Carpites'''	1	9.18367
			'''Momipites'''	1	3.51847		'''Betula'''	1	6.08971		'''Corylus'''	1	5.37084		'''Cunninghamites'''	3	9.18367
			'''Cibotiumspora'''	2	2.63885		'''Carya'''	1	3.04486		'''Platanus'''	1	4.69949		'''Viburnum'''	1	9.18367
			'''Ischyosporites'''	2	2.63885		'''Lycopodiacidites'''	2	3.04486		'''Viburnum'''	1	4.69949		'''Sequoia'''	3	5.10204
			'''Tricolporopollenites'''	1	2.34565		'''Pinus'''	3	3.04486		'''Sequoia'''	3	4.21995		'''Quercus'''	1	4.59184
			'''Matonisporites'''	2	2.19904		'''Podocarpus'''	3	3.04486		'''Salix'''	1	4.02813		'''Vitis'''	1	4.59184
			'''Todisporites'''	2	2.19904		'''Polypodiumsporites'''	2	3.04486		'''Symphorocarpophyllum'''	1	4.02813		'''Betulites'''	1	3.06122
			'''Triporoletes'''	2	2.19904		'''Liliacidites'''	1	2.85455		'''Juglans'''	1	3.58056		'''Canna'''	1	3.06122
			'''Cicatricosisporites'''	2	1.8472		'''Foveosporites'''	2	2.28364		'''Rhamnus'''	1	3.58056		'''Cercidiphyllum'''	1	3.06122
			'''Liliacidites'''	1	1.8472		'''Momipites'''	1	2.28364		'''Aesculus'''	1	2.68542		'''Cornus'''	1	3.06122
			'''Cranwellia'''	1	1.75924		'''Polypodiisporites'''	2	2.28364		'''Canna'''	1	2.68542		'''Cupressinocladus'''	3	3.06122
			'''Heliosporites'''	2	1.75924		'''Trudopollis'''	1	2.28364		'''Carpolithes'''	1	2.68542		'''Dammara'''	3	3.06122
			'''Podocarpites'''	3	1.75924		'''Cranwellia'''	1	2.0299		'''Carya'''	1	2.68542		'''Dryophyllum'''	1	3.06122
			'''Tricolporapollenites'''	1	1.75924		'''Podocarpidites'''	3	2.0299		'''Cephalotaxus'''	3	2.68542		'''Elatides'''	3	3.06122
			'''Inaperturopollenites'''	3	1.63358		'''Tricolporites'''	1	2.0299		'''Cercidiphyllum'''	1	2.68542		'''Grewiopsis'''	1	3.06122
			'''Podocarpidites'''	3	1.53933		'''Cicatricosisporites'''	2	1.73992		'''Cunninghamites'''	3	2.68542		'''Juglans'''	1	3.06122
			'''Cyathidites'''	2	1.49535		'''Cyathidites'''	2	1.69159		'''Cupressinoxylon'''	3	2.68542		'''Mesocyparis'''	3	3.06122
			'''Erdtmanipollis'''	1	1.31943		'''Appendicisporites'''	2	1.52243		'''Dryophyllum'''	1	2.68542		'''Metasequoia'''	3	3.06122
			'''Foveosporites'''	2	1.31943		'''Biretisporites'''	2	1.52243		'''Grewiopsis'''	1	2.68542		'''Osmunda'''	2	3.06122
			'''Lycopodiacidites'''	2	1.31943		'''Classopollis'''	3	1.52243		'''Osmunda'''	2	2.68542		'''Platanaceae'''	1	3.06122
			'''Osmundacidites'''	2	1.31943		'''Corollina'''	3	1.52243		'''Platanophyllum'''	1	2.68542		'''Platanites'''	1	3.06122
			'''Trudopollis'''	1	1.31943		'''Deltoidospora'''	2	1.52243		'''Podocarpus'''	3	2.68542		'''Protophyllocladus'''	1	3.06122
			'''Taxodiaceaepollenites'''	3	1.2566		'''Erdtmanipollis'''	1	1.52243		'''Podozamites'''	3	2.68542		'''Rhamnus'''	1	3.06122
			'''Appendicisporites'''	2	1.23147		'''Hamulatisporis'''	2	1.52243		'''Quercophyllum'''	1	2.68542		'''Thuja'''	3	3.06122
			'''Hamulatisporis'''	2	1.17282		'''Heliosporites'''	2	1.52243		'''Quercus'''	1	2.68542		'''Woodwardia'''	2	3.06122
			'''Corollina'''	3	1.05554		'''Ilexpollenites'''	1	1.52243		'''Ribes'''	1	2.68542
			'''Deltoidospora'''	2	1.05554		'''Inaperturates'''	3	1.52243		'''Salisburia'''	3	2.68542
			'''Vitreisporites'''	3	1.05554		'''Inaperturopollenites'''	3	1.52243		'''Sassafras'''	1	2.68542
			'''Tricolporites'''	1	1.02622		'''Inaperturotetradites'''	1	1.52243		'''Thuja'''	3	2.68542
			'''Acer'''	1	0.879618		'''Ischyosporites'''	2	1.52243		'''Ulmus'''	1	2.68542
			'''Apiculatisporites'''	2	0.879618		'''Kurtzipites'''	1	1.52243		'''Vitis'''	1	2.68542
			'''Betulaceoipollenites'''	1	0.879618		'''Microfoveolatosporis'''	2	1.52243
			'''Biretisporites'''	2	0.879618		'''Minorpollis'''	1	1.52243
			'''Caryapollenites'''	1	0.879618		'''Osmundacidites'''	2	1.52243
			'''Classopollis'''	3	0.879618		'''Periporopollenites'''	1	1.52243
			'''Exesipollenites'''	3	0.879618		'''Phyllocladidites'''	3	1.52243
			'''Extrapunctatosporis'''	2	0.879618		'''Polypodiidites'''	2	1.52243
			'''Foveasporis'''	2	0.879618		'''Quercus'''	1	1.52243
			'''Granulatisporites'''	2	0.879618		'''Sequoiapollenites'''	3	1.52243
			'''Ilexpollenites'''	1	0.879618		'''Subtriporopollenites'''	1	1.52243
			'''Inaperturotetradites'''	1	0.879618		'''Taurocusporites'''	2	1.52243
			'''Kurtzipites'''	1	0.879618		'''Taxodiaceaepollenites'''	3	1.52243
			'''Liburnisporis'''	2	0.879618		'''Tilia'''	1	1.52243
			'''Liburnisporites'''	1	0.879618		'''Todisporites'''	2	1.52243
			'''Lygistepollenites'''	3	0.879618		'''Triatriopollenites'''	1	1.52243
			'''Microfoveolatosporis'''	2	0.879618		'''Tricolporopollenites'''	1	1.52243
			'''Multinodisporites'''	2	0.879618		'''Triletes'''	2	1.52243
			'''Nothopollenites'''	1	0.879618		'''Ulmipollenites'''	1	1.52243
			'''Nudopollis'''	1	0.879618		'''Vitreisporites'''	3	1.52243
			'''Pachysandra'''	1	0.879618		'''Zonalapollenites'''	3	1.52243
			'''Parvisaccites'''	3	0.879618
			'''Periporopollenites'''	1	0.879618
			'''Phyllocladidites'''	3	0.879618
			'''Pilosisporites'''	2	0.879618
			'''Pinuspollenites'''	3	0.879618
			'''Polypodiidites'''	2	0.879618
			'''Polypodiisporites'''	2	0.879618
			'''Polyporina'''	1	0.879618
			'''Projectoporites'''	1	0.879618
			'''Protoquercus'''	1	0.879618
			'''Pterocaryapollenites'''	1	0.879618
			'''Quercoidites'''	1	0.879618
			'''Rogalskaisporites'''	2	0.879618
			'''Rugulatisporites'''	2	0.879618
			'''Sequoiapollenites'''	3	0.879618
			'''Striatopollis'''	1	0.879618
			'''Subtriporopollenites'''	1	0.879618
			'''Thomsonipollis'''	1	0.879618
			'''Tilia'''	1	0.879618
			'''Tiliaepollenites'''	1	0.879618
			'''Triatriopollenites'''	1	0.879618
			'''Tricolpites'''	1	0.879618
			'''Triletes'''	2	0.879618
			'''Trilites'''	2	0.879618
			'''Triquitrites'''	2	0.879618
			'''Trivestibulopollenites'''	1	0.879618
			'''Tsugaepollenites'''	3	0.879618
			'''Tubulifloridites'''	1	0.879618
			'''Ulmipollenites'''	1	0.879618
			'''Verrutricolpites'''	1	0.879618
			'''Verrutricolporites'''	1	0.879618
			'''Verrutriporites'''	1	0.879618
	Tropical Lowland Forest		'''Monocolpopollenites'''	1	6.95748		'''Cycadopites'''	3	13.3333		'''Ficus'''	1	13.5338		'''Ficus'''	1	14.2857
			'''Distaltriangulisporites'''	2	4.63832		'''Alsophilidites'''	2	6.66667		'''Laurophyllum'''	1	9.66702		'''Asimina'''	1	7.14286
			'''Entylissa'''	3	4.63832		'''Ceratosporites'''	2	6.66667		'''Anemia'''	2	4.83351		'''Laurophyllum'''	1	7.14286
			'''Gnetaceaepollenites'''	3	4.63832		'''Gnetaceaepollenites'''	3	6.66667		'''Asplenium'''	2	4.83351		'''Nilssoniocladus'''	3	7.14286
			'''Plicatella'''	2	4.63832		'''Klukisporites'''	2	6.66667		'''Leguminosites'''	1	4.83351		'''Aristolochites'''	1	3.57143
			'''Quadripollis'''	1	4.63832		'''Kuylisporites'''	2	6.66667		'''Myrtophyllum'''	1	4.29646		'''Artocarpus'''	1	3.57143
			'''Schizaea'''	2	4.63832		'''Myrtaceoipollenites'''	1	6.66667		'''Aristolochia'''	1	3.22234		'''Celastrinites'''	1	3.57143
			'''Verrucatosporites'''	2	3.47874		'''Neoraistrickia'''	2	6.66667		'''Catalpa'''	1	3.22234		'''Celastrus'''	1	3.57143
			'''Verrucosisporites'''	2	3.09221		'''Phaseoliidites'''	1	6.66667		'''Celastrinites'''	1	3.22234		'''Cinnamomum'''	1	3.57143
			'''Cycadopites'''	3	2.98178		'''Quadrapollenites'''	1	6.66667		'''Celastrus'''	1	3.22234		'''Dalbergites'''	1	3.57143
			'''Alsophilidites'''	2	2.31916		'''Quadripollis'''	1	6.66667		'''Cinnamomum'''	1	3.22234		'''Dilleniales'''	1	3.57143
			'''Anacolosidites'''	1	2.31916		'''Senftenbergia'''	1	6.66667		'''Cladophlebis'''	2	3.22234		'''Diospyros'''	1	3.57143
			'''Anemia'''	2	2.31916		'''Symplocoipollenites'''	1	6.66667		'''Cornophyllum'''	1	3.22234		'''Laurales'''	1	3.57143
			'''Ceratosporites'''	2	2.31916		'''Triplanosporites'''	2	6.66667		'''Cyathea'''	2	3.22234		'''Magnolia'''	1	3.57143
			'''Cycadophytus'''	3	2.31916						'''Davallia'''	2	3.22234		'''Magnoliaceae'''	1	3.57143
			'''Dicoryphe'''	1	2.31916						'''Dillenites'''	1	3.22234		'''Magnoliophyllum'''	1	3.57143
			'''Hemitelia'''	2	2.31916						'''Magnifolia'''	1	3.22234		'''Marmarthia'''	1	3.57143
			'''Klukisporites'''	2	2.31916						'''Magnolia'''	1	3.22234		'''Menispermites'''	1	3.57143
			'''Kuylisporites'''	2	2.31916						'''Malapoenna'''	1	3.22234		'''Pterospermites'''	1	3.57143
			'''Loranthacites'''	1	2.31916						'''Menispermites'''	1	3.22234		'''Sapindus'''	1	3.57143
			'''Lygodiosporites'''	2	2.31916						'''Palmoxylon'''	1	3.22234		'''Zamites'''	3	3.57143
			'''Lygodiumsporites'''	2	2.31916						'''Pterospermites'''	1	3.22234		'''Zingiberopsis'''	1	3.57143
			'''Margocolporites'''	1	2.31916						'''Sapindus'''	1	3.22234
			'''Neoraistrickia'''	2	2.31916						'''Zizyphus'''	1	3.22234
			'''Palmaepollenites'''	1	2.31916
			'''Quadrapollenites'''	1	2.31916
			'''Rousea'''	1	2.31916
			'''Ruffordiaspora'''	2	2.31916
			'''Symplocoipollenites'''	1	2.31916
			'''Syncolporites'''	1	2.31916
			'''Syncolporopollenites'''	1	2.31916
			'''Triplanosporites'''	2	2.31916
			'''Undulatisporites'''	2	2.31916
			'''Varirugosisporites'''	2	2.31916
	Upland Forest		'''Retitriletes'''	2	15.3846		'''Cedripites'''	3	33.3333		'''Cissus'''	1	100
			'''Lycopodiumsporites'''	2	7.69231		'''Lycopodium'''	2	33.3333
			'''Abiespollenites'''	3	5.12821		'''Abietineaepollenites'''	3	16.6667
			'''Abietineaepollenites'''	3	5.12821		'''Lycopodiumsporites'''	2	16.6667
			'''Callialasporites'''	3	5.12821
			'''Cedripites'''	3	5.12821
			'''Clavatisporites'''	2	5.12821
			'''Lycopodium'''	2	5.12821
			'''Ornamentifera'''	2	5.12821
			'''Piceaepollenites'''	3	5.12821
			'''Piceites'''	3	5.12821
			'''Pleurospermaepollenites'''	1	5.12821
			'''Reticulatasporites'''	2	5.12821
			'''Reticulisporites'''	2	5.12821
			'''Reticuloidosporites'''	2	5.12821
			'''Rosannia'''	1	5.12821
			'''Sestrosporites'''	2	5.12821
	Wet or Successional		'''Alnipollenites'''	1	13.5266		'''Alnipollenites'''	1	10		'''Populus'''	1	30		'''Populus'''	1	50
			'''Nyssapollenites'''	1	10.1449		'''Cupanieidites'''	1	10		'''Cyperacites'''	1	10		'''Colutea'''	1	16.6667
			'''Cupanieidites'''	1	8.69565		'''Engelhardtia'''	1	10		'''Equisetum'''	2	10		'''Cyperacites'''	1	16.6667
			'''Alnus'''	1	6.76329		'''Engelhardtioidites'''	1	10		'''Eriocaulon'''	1	10		'''Taxodium'''	3	16.6667
			'''Calamospora'''	2	6.76329		'''Ericaceoipollenites'''	1	10		'''Myrica'''	1	10
			'''Engelhardtioidites'''	1	6.76329		'''Gabonisporis'''	2	10		'''Onoclea'''	2	10
			'''Ericaceoipollenites'''	1	6.76329		'''Microreticulatisporites'''	2	10		'''Sparganium'''	1	10
			'''Ericipites'''	1	6.76329		'''Nyssa'''	1	10		'''Taxodium'''	3	10
			'''Gabonisporis'''	2	6.76329		'''Salixipollenites'''	1	10
			'''Microreticulatisporites'''	2	6.76329		'''Sporopollis'''	1	10
			'''Nevesisporites'''	2	6.76329
			'''Nyssoidites'''	1	6.76329
			'''Sporopollis'''	1	6.76329
	Dataset S5ba. Late Maastrichtian (75 to 66 Ma) vegetation ecotypes and mean abundance of angiosperm, fern/moss, and gymnosperm genera for all identifiable specimens.
	Ecotype		Pollen								Leaf
			South				North				South				North
			Genera	Group	Abd. (%)		Genera	Group	Abd. (%)		Genera	Group	Abd. (%)		Genera	Group	Abd. (%)
	Coastal Plain		'''Bisaccates'''	3	8.98708		'''Tricolpopollenites'''	1	10.0106		'''Araliaephyllum'''	1	8.33333		'''Liriodendron'''	1	14.6341
			'''Mancicorpus'''	1	4.49354		'''Penetetrapites'''	1	5.00531		'''Araucaria'''	3	8.33333		'''Araucarites'''	3	12.1951
			'''Tricolpites'''	1	3.83823		'''Tricolpites'''	1	4.3986		'''Araucariaceae'''	3	8.33333		'''Erlingdorfia'''	1	12.1951
			'''Cingulatisporites'''	2	3.74462		'''Retitrescolpites'''	1	3.33687		'''Brachyphyllum'''	3	8.33333		'''Erlingodorfia'''	1	12.1951
			'''Monosulcites'''	1	3.74462		'''Stereigranisporis'''	2	3.33687		'''Erlingdorfia'''	1	8.33333		'''Hamamelidales'''	1	12.1951
			'''Tricolpopollenites'''	1	3.74462		'''Triporopollenites'''	1	3.33687		'''Erlingodorfia'''	1	8.33333		'''Leepierceia'''	1	12.1951
			''Leptopecopites'''	2	2.99569		'''Stereisporites'''	2	2.50265		'''Laurus'''	1	8.33333		'''Liriodendrites'''	1	12.1951
			'''Stereisporites'''	2	2.32998		'''Balmeisporites'''	3	2.33581		'''Leepierceia'''	1	8.33333		'''Macclintockia'''	1	12.1951
			'''Laevigatosporites'''	2	2.2967		'''Laevigatosporites'''	2	2.33581		'''Liriodendrites'''	1	8.33333
			'''Camarozonosporites'''	2	1.99713		'''Aesculiidites'''	1	1.66844		'''Liriodendron'''	1	8.33333
			'''Leptolepidites'''	2	1.74749		'''Albertipollenites'''	1	1.66844		'''Phoenocites'''	1	8.33333
			'''Triporopollenites'''	1	1.66427		'''Alisporites'''	3	1.66844		'''Williamsonia'''	3	8.33333
			'''Aequitriradites'''	2	1.49785		'''Araucariacites'''	3	1.66844
			'''Araucariacites'''	3	1.49785		'''Baculatisporites'''	2	1.66844
			'''Baculatisporites'''	2	1.49785		'''Callistopollenites'''	1	1.66844
			'''Balmeisporites'''	3	1.49785		'''Camarozonosporites'''	2	1.66844
			'''Beaupreaidites'''	1	1.49785		'''Cingulatisporites'''	2	1.66844
			'''Callistopollenites'''	1	1.49785		'''Cingutriletes'''	2	1.66844
			'''Cardioangulina'''	2	1.49785		'''Concavisporites'''	2	1.66844
			'''Cercidiphyllites'''	1	1.49785		'''Conclavipollis'''	1	1.66844
			'''Cingutriletes'''	2	1.49785		'''Densoisporites'''	2	1.66844
			'''Discoidites'''	1	1.49785		'''Dictyophyllidites'''	2	1.66844
			'''Dyadonapites'''	1	1.49785		'''Eucommiidites'''	3	1.66844
			'''Eucommiidites'''	3	1.49785		'''Foraminisporis'''	2	1.66844
			'''Foraminisporis'''	2	1.49785		'''Grewipollenites'''	1	1.66844
			'''Grewipollenites'''	1	1.49785		'''Hannisporis'''	2	1.66844
			'''Gunnaripollis'''	1	1.49785		'''Inundatisporis'''	2	1.66844
			'''Leschikisporis'''	2	1.49785		'''Leptolepidites'''	2	1.66844
			'''Marsypiletes'''	1	1.49785		'''Leptopecopites'''	1	1.66844
			'''Navisulcites'''	1	1.49785		'''Mancicorpus'''	1	1.66844
			'''Palaeoisoetes'''	2	1.49785		'''Marcellopites'''	1	1.66844
			'''Paliurus'''	1	1.49785		'''Marsypiletes'''	1	1.66844
			'''Penetetrapites'''	1	1.49785		'''Myricipites'''	1	1.66844
			'''Pistillipollenites'''	1	1.49785		'''Paraalnipollenites'''	1	1.66844
			'''Pityosporites'''	3	1.49785		'''Pistillipollenites'''	1	1.66844
			'''Polycingulatisporites'''	2	1.49785		'''Pityosporites'''	3	1.66844
			'''Pseudoplicapollis'''	1	1.49785		'''Plicapollis'''	1	1.66844
			'''Raistrickia'''	2	1.49785		'''Polycingulatisporites'''	2	1.66844
			'''Retibrevitricolporites'''	1	1.49785		'''Pseudoplicapollis'''	1	1.66844
			'''Retitrescolpites'''	1	1.49785		'''Psilatriletes'''	2	1.66844
			'''Rugubivesiculites'''	3	1.49785		'''Rugubivesiculites'''	3	1.66844
			'''Sabalpollenites'''	1	1.49785		'''Santalacites'''	1	1.66844
			'''Scabrastephanocolpites'''	1	1.49785		'''Scabrastephanocolpites'''	1	1.66844
			'''Senipites'''	1	1.49785		'''Simpsonipollis'''	1	1.66844
			'''Siberiapollis'''	1	1.49785		'''Tschudypollis'''	1	1.66844
			'''Simplicepollis'''	1	1.49785
			'''Stereisporites-Cingulatisporites'''	2	1.49785
			'''Striatellipollis'''	1	1.49785
			'''Toroisporis'''	2	1.49785
			'''Trialapollis'''	1	1.49785
			'''Tschudypollis'''	1	1.49785
	Estuarine or Aquatic		'''Fraxinoipollenites'''	1	29.4737		'''Azolla'''	2	30.4636		'''Trapa'''	1	13.986		'''Trapa'''	1	19.5122
			'''Azolla'''	2	20		'''Zonosulcites'''	1	13.9073		'''Paranymphaea'''	1	9.09091		'''Paranymphaea'''	1	12.1951
			'''Echinatispora'''	2	8.42105		'''Echimonocolpites'''	1	9.27152		'''Hydropteris'''	2	6.99301		'''Castanea'''	1	9.7561
			'''Echinatisporis'''	2	8.42105		'''Echinatisporis'''	2	9.27152		'''Lemna'''	1	6.99301		'''Lemna'''	1	9.7561
			'''Echinisporites'''	2	8.42105		'''Foveotricolpites'''	1	9.27152		'''Limnobiophyllum'''	1	6.99301		'''Nelumbo'''	1	9.7561
			'''Echitricolpites'''	1	8.42105		'''Foveotricolporites'''	1	9.27152		'''Nelumbium'''	1	6.99301		'''Phragmites'''	1	9.7561
			'''Foveotriletes'''	2	8.42105		'''Fraxinoipollenites'''	1	9.27152		'''Nelumbo'''	1	6.99301		'''Pistia'''	1	9.7561
			'''Zonosulcites'''	1	8.42105		'''Wilsonipites'''	1	9.27152		'''Phragmites'''	1	6.99301		'''Quereuxia'''	1	9.7561
											'''Pistia'''	1	6.99301		'''Scirpus'''	1	9.7561
											'''Quereuxia'''	1	6.99301
											'''Salvinia'''	2	6.99301
											'''Scirpus'''	1	6.99301
											'''Typha'''	1	6.99301
	Open Scrubland		'''Mohria'''	2	27.907		'''Equisetosporites'''	2	24.6575						'''Paliurus'''	1	50
			'''Ephedripites'''	3	16.2791		'''Ephedripites'''	3	20.5479						'''Pistacia'''	1	50
			'''Ephedra'''	3	13.9535		'''Coriaripites'''	1	13.6986
			'''Equisetosporites'''	2	13.9535		'''Ephedra'''	3	13.6986
			'''Monoporopollenites'''	1	13.9535		'''Lusatisporis'''	2	13.6986
			'''Tetracolpites'''	1	13.9535		'''Tetracolpites'''	1	13.6986
	Swampy or Lagoonal		'''Intertriletes'''	2	6.68151		'''Pandaniidites'''	1	7.86296		'''Glyptostrobus'''	3	58.8235		'''Glyptostrobus'''	3	100
			'''Orbiculapollis'''	1	6.68151		'''Arecipites'''	1	6.88009		'''Rhizopalmoxylon'''	1	41.1765
			'''Pulcheripollenites'''	1	6.68151		'''Rhoipites'''	1	5.89722
			'''Sphagnumsporites'''	2	6.68151		'''Scollardia'''	1	5.89722
			'''Cupuliferoidaepollenites'''	1	5.19673		'''Ghoshispora'''	2	5.50407
			'''Sphagnum'''	2	5.19673		'''Wodehouseia'''	1	5.05476
			'''Gleichenia'''	2	4.45434		'''Acanthotriletes'''	2	3.93148
			'''Laricoidites'''	3	4.45434		'''Accuratipollis'''	1	3.93148
			'''Sparganiaceaepollenites'''	1	4.45434		'''Ailanthipites'''	1	3.93148
			'''Arecipites'''	1	3.34076		'''Cupuliferoidaepollenites'''	1	3.93148
			'''Rhoipites'''	1	3.11804		'''Cupuliferoipollenites'''	1	3.93148
			'''Wodehouseia'''	1	2.96956		'''Gleicheniidites'''	2	3.93148
			'''Acanthotriletes'''	2	2.22717		'''Laricoidites'''	3	3.93148
			'''Ailanthipites'''	1	2.22717		'''Marattisporites'''	2	3.93148
			'''Chenopodipollis'''	1	2.22717		'''Myrtipites'''	1	3.93148
			'''Extratriporopollenites'''	1	2.22717		'''Normapolles'''	1	3.93148
			'''Ghoshispora'''	2	2.22717		'''Orbiculapollis'''	1	3.93148
			'''Gleicheniidites'''	2	2.22717		'''Spermatites'''	3	3.93148
			'''Hymenophyllumsporites'''	2	2.22717		'''Sphagnum'''	2	3.93148
			'''Latipollis'''	1	2.22717		'''Translucentipollis'''	1	3.93148
			'''Leiotriletes'''	2	2.22717		'''Vitipites'''	1	3.93148
			'''Marattisporites'''	2	2.22717		'''Zlivisporis'''	2	3.93148
			'''Myriophyllum'''	1	2.22717
			'''Myrtipites'''	1	2.22717
			'''Pandaniidites'''	1	2.22717
			'''Punctatisporites'''	2	2.22717
			'''Singhia'''	3	2.22717
			'''Vitis'''	1	2.22717
			'''Zlivisporis'''	2	2.22717
			'''Zlivisporites'''	2	2.22717
	Temperate Lowland Forest		'''Aquilapollenites'''	1	5.62468		'''Aquilapollenites'''	1	7.94688		'''Androvettia'''	3	1.58154		'''Aesculus'''	1	2.50836
			'''Taxaceae-Cupressaceae-Taxodiaceae'''	3	5.50241		'''Betulaceae-Myricaceae'''	1	3.91901		'''Berberidaceae'''	1	1.58154		'''Berberidaceae'''	1	2.50836
			'''Foveasporis'''	2	3.20974		'''Rutihesperipites'''	1	3.91901		'''Betula'''	1	1.58154		'''Carpites'''	1	2.50836
			'''Hydrosporis'''	2	2.7512		'''Ulmoideipites'''	1	3.91901		'''Canna'''	1	1.58154		'''Cercidiphyllum'''	1	2.50836
			'''Triporoletes'''	2	2.7512		'''Kurtzipites'''	1	2.83039		'''Cannabaceae'''	1	2.37232		'''Cornus'''	1	2.50836
			'''Betula'''	1	2.29267		'''Foveosporites'''	2	2.61267		'''Carpites'''	1	2.21416		'''Cupressinocladus'''	3	2.50836
			'''Kurtzipites'''	1	2.10926		'''Pinuspollenites'''	3	2.61267		'''Carpolithes'''	1	1.58154		'''Dammarites'''	3	2.50836
			'''Foveosporites'''	2	1.83414		'''Striatopollis'''	1	2.61267		'''Carya'''	1	1.58154		'''Dryophyllum'''	1	4.01338
			'''Lycopodiacidites'''	2	1.83414		'''Tricolporites'''	1	2.61267		'''Cephalotaxus'''	3	1.58154		'''Elatides'''	3	2.50836
			'''Momipites'''	1	1.83414		'''Triporoletes'''	2	2.61267		'''Cercidiphyllaceae'''	1	1.58154		'''Fagaceae'''	1	2.50836
			'''Pinus'''	3	1.83414		'''Ulmipollenites'''	1	2.61267		'''Cercidiphyllales'''	1	1.58154		'''Fokieniopsis'''	3	2.50836
			'''Polypodiumsporites'''	2	1.83414		'''Podocarpidites'''	3	2.28609		'''Cercidiphyllum'''	1	1.97693		'''Ginkgo'''	3	2.50836
			'''Pseudotricolpites'''	1	1.83414		'''Liliacidites'''	1	2.17723		'''Cocculus'''	1	1.58154		'''Grewiopsis'''	1	2.50836
			'''Pterocarya'''	1	1.83414		'''Quercoidites'''	1	2.17723		'''Corylus'''	1	3.16309		'''Juglans'''	1	2.50836
			'''Todisporites'''	2	1.83414		'''Cyathidites'''	2	2.09014		'''Cupressaceae'''	3	2.37232		'''Mesocyparis'''	3	2.50836
			'''Liliacidites'''	1	1.76863		'''Classopollis'''	3	1.9595		'''Cupressinocladus'''	3	1.58154		'''Metasequoia'''	3	2.50836
			'''Ulmipollenites'''	1	1.7195		'''Cranwellia'''	1	1.9595		'''Cupressinoxylon'''	3	1.58154		'''Osmunda'''	2	2.50836
			'''Hamulatisporis'''	2	1.68129		'''Tricolporopollenites'''	1	1.9595		'''Dammarites'''	3	1.58154		'''Palaeoaster'''	1	2.50836
			'''Triatriopollenites'''	1	1.60487		'''Appendicisporites'''	2	1.63292		'''Dicotylophyllum'''	1	1.58154		'''Platanaceae'''	1	5.64381
			'''Appendicisporites'''	2	1.3756		'''Erdtmanipollis'''	1	1.63292		'''Dryophyllum'''	1	2.82419		'''Platanites'''	1	4.1806
			'''Carya'''	1	1.3756		'''Hamulatisporis'''	2	1.63292		'''Elatides'''	3	1.58154		'''Platanophyllum'''	1	3.76254
			'''Matonisporites'''	2	1.3756		'''Momipites'''	1	1.5676		'''Fagaceae'''	1	1.58154		'''Platanus'''	1	2.50836
			'''Podocarpus'''	3	1.3756		'''Cicatricosisporites'''	2	1.52406		'''Fokieniopsis'''	3	1.58154		'''Quercus'''	1	2.50836
			'''Polypodiidites'''	2	1.3756		'''Betulaceoipollenites'''	1	1.30634		'''Ginkgo'''	3	1.58154		'''Rhamnus'''	1	2.50836
			'''Cicatricosisporites'''	2	1.33392		'''Carpinites'''	1	1.30634		'''Grewiopsis'''	1	2.03341		'''Salisburia'''	3	2.50836
			'''Cranwellia'''	1	1.3101		'''Corollina'''	3	1.30634		'''Juglans'''	1	2.37232		'''Salix'''	1	5.01672
			'''Cyathidites'''	2	1.25055		'''Deltoidospora'''	2	1.30634		'''Metasequoia'''	3	2.10872		'''Sapindopsis'''	1	2.50836
			'''Deltoidospora'''	2	1.06991		'''Foveasporis'''	2	1.30634		'''Osmunda'''	2	1.58154		'''Sassafras'''	1	2.50836
			'''Inaperturopollenites'''	3	1.06991		'''Heliosporites'''	2	1.30634		'''Palaeoaster'''	1	1.58154		'''Sequoia'''	3	3.13545
			'''Osmundacidites'''	2	1.04808		'''Ilexpollenites'''	1	1.30634		'''Platanaceae'''	1	8.13365		'''Symphorocarpophyllum'''	1	5.01672
			'''Apiculatisporites'''	2	0.917068		'''Inaperturopollenites'''	3	1.30634		'''Platanites'''	1	3.16309		'''Ulmaceae'''	1	2.50836
			'''Betulaceae-Myricaceae-Casuarinaceae'''	1	0.917068		'''Libopollis'''	1	1.30634		'''Platanophyllum'''	1	1.58154		'''Ulmus'''	1	2.50836
			'''Caprifoliipites'''	1	0.917068		'''Liburnisporis'''	2	1.30634		'''Platanus'''	1	2.7677		'''Viburnum'''	1	2.50836
			'''Carpinus'''	1	0.917068		'''Liliipollis'''	1	1.30634		'''Podocarpus'''	3	1.58154		'''Vitis'''	1	4.01338
			'''Caryapollenites'''	1	0.917068		'''Matonisporites'''	2	1.30634		'''Podozamites'''	3	1.58154
			'''Classopollis'''	3	0.917068		'''Nudopollis'''	1	1.30634		'''Protophyllocladus'''	1	1.58154
			'''Corollina'''	3	0.917068		'''Osmundacidites'''	2	1.30634		'''Quercophyllum'''	1	1.58154
			'''Corylus'''	1	0.917068		'''Parvisaccites'''	3	1.30634		'''Quercus'''	1	2.37232
			'''Erdtmanipollis'''	1	0.917068		'''Phyllocladidites'''	3	1.30634		'''Rhamnus'''	1	1.75727
			'''Extrapunctatosporis'''	2	0.917068		'''Polypodiisporites'''	2	1.30634		'''Salisburia'''	3	1.58154
			'''Granulatisporites'''	2	0.917068		'''Polyporina'''	1	1.30634		'''Salix'''	1	1.58154
			'''Inaperturotetradites'''	1	0.917068		'''Rugulatisporites'''	2	1.30634		'''Sassafras'''	1	1.58154
			'''Libopollis'''	1	0.917068		'''Sequoiapollenites'''	3	1.30634		'''Sequoia'''	3	1.75727
			'''Liburnisporis'''	2	0.917068		'''Taxodiaceaepollenites'''	3	1.30634		'''Symphorocarpophyllum'''	1	1.58154
			'''Nothopollenites'''	1	0.917068		'''Tetraporate'''	1	1.30634		'''Thuja'''	3	1.58154
			'''Nudopollis'''	1	0.917068		'''Todisporites'''	2	1.30634		'''Ulmaceae'''	1	1.80748
			'''Osmunda'''	2	0.917068		'''Triatriopollenites'''	1	1.30634		'''Ulmus'''	1	1.58154
			'''Pachysandra'''	1	0.917068		'''Trilites'''	2	1.30634		'''Viburnum'''	1	3.55847
			'''Periporopollenites'''	1	0.917068		'''Trudopollis'''	1	1.30634		'''Vitis'''	1	2.63591
			'''Pilosisporites'''	2	0.917068		'''Tsugaepollenites'''	3	1.30634		'''Woodwardia'''	2	1.58154
			'''Pinuspollenites'''	3	0.917068		'''Tubulifloridites'''	1	1.30634
			'''Podocarpaceae-Pinaeae'''	3	0.917068		'''Vitreisporites'''	3	1.30634
			'''Podocarpidites'''	3	0.917068		'''Zonalapollenites'''	3	1.30634
			'''Polypodiisporites'''	2	0.917068
			'''Polyporina'''	1	0.917068
			'''Porosipollis'''	1	0.917068
			'''Projectoporites'''	1	0.917068
			'''Psuedotricolpites'''	1	0.917068
			'''Pterocaryapollenites'''	1	0.917068
			'''Quercoidites'''	1	0.917068
			'''Sequoiapollenites'''	3	0.917068
			'''Striatopollis'''	1	0.917068
			'''Taxodiaceae-Cupressaceae'''	3	0.917068
			'''Taxodiaceaepollenites'''	3	0.917068
			'''Thuja'''	3	0.917068
			'''Tilia'''	1	0.917068
			'''Tiliaepollenites'''	1	0.917068
			'''Tricolporites'''	1	0.917068
			'''Tricolporopollenites'''	1	0.917068
			'''Triletes'''	2	0.917068
			'''Trivestibulopollenites'''	1	0.917068
			'''Tsugaepollenites'''	3	0.917068
			'''Tubulifloridites'''	1	0.917068
			'''Vitreisporites'''	3	0.917068
	Tropical Lowland Forest		'''Anemia'''	2	7.76699		'''Margocolporites'''	1	11.5016		'''Laurales'''	1	5.29221		'''Asimina'''	1	5.61535
			'''Schizaea'''	2	7.76699		'''Syncolporites'''	1	11.5016		'''Magnoliaceae'''	1	3.66384		'''Laurales'''	1	5.61535
			'''Varirugosisporites'''	2	7.76699		'''Monocolpopollenites'''	1	7.66773		'''Asplenium'''	2	3.25674		'''Nilssoniocladus'''	3	5.61535
			'''Verrucosisporites'''	2	5.82524		'''Neoraistrickia'''	2	7.66773		'''Leguminosites'''	1	3.25674		'''Dombeyopsis'''	1	4.67946
			'''Cycadopites'''	3	4.85437		'''Verrucatosporites'''	2	7.66773		'''Marmarthia'''	1	3.25674		'''Laurophyllum'''	1	4.67946
			'''Alsophilidites'''	2	3.8835		'''Cycadopites'''	3	6.70927		'''Myrtophyllum'''	1	3.25674		'''Ficus'''	1	4.21151
			'''Anacolosidites'''	1	3.8835		'''Gnetaceaepollenites'''	3	5.11182		'''Saururaceae'''	1	3.25674		'''Marmarthia'''	1	3.74357
			'''Ceratosporites'''	2	3.8835		'''Alsophilidites'''	2	3.83387		'''Ficus'''	1	2.96068		'''Cinnamomum'''	1	3.50959
			'''Dicoryphe'''	1	3.8835		'''Ceratosporites'''	2	3.83387		'''Laurophyllum'''	1	2.93107		'''Magnoliaceae'''	1	3.36921
			'''Gunnera'''	1	3.8835		'''Gunnera'''	1	3.83387		'''Dombeyopsis'''	1	2.27972		'''Amesoneuron'''	1	2.80767
			'''Klukisporites'''	2	3.8835		'''Lygodiosporites'''	2	3.83387		'''Amesoneuron'''	1	2.17116		'''Artocarpus'''	1	2.80767
			'''Loranthacites'''	1	3.8835		'''Lygodiumsporites'''	2	3.83387		'''Zizyphus'''	1	2.03546		'''Celastrinites'''	1	2.80767
			'''Lygodiumsporites'''	2	3.8835		'''Myrtaceidites'''	1	3.83387		'''Artocarpus'''	1	1.89977		'''Celastrus'''	1	2.80767
			'''Margocolporites'''	1	3.8835		'''Quadripollis'''	1	3.83387		'''Trochodendroides'''	1	1.861		'''Cornophyllum'''	1	2.80767
			'''Neoraistrickia'''	2	3.8835		'''Rousea'''	1	3.83387		'''Anemia'''	2	1.62837		'''Dalbergites'''	1	2.80767
			'''Racemonocolpites'''	1	3.8835		'''Symplocoipollenites'''	1	3.83387		'''Aristolochia'''	1	1.62837		'''Dilleniales'''	1	2.80767
			'''Rousea'''	1	3.8835		'''Triplanosporites'''	2	3.83387		'''Aristolochites'''	1	1.62837		'''Dillenites'''	1	2.80767
			'''Senftenbergia'''	1	3.8835		'''Varirugosisporites'''	2	3.83387		'''Catalpa'''	1	1.62837		'''Harmsia'''	1	2.80767
			'''Syncolporites'''	1	3.8835						'''Celastrinites'''	1	1.62837		'''Laurales?'''	1	2.80767
			'''Syncolporopollenites'''	1	3.8835						'''Celastrus'''	1	1.62837		'''Marchantia'''	2	2.80767
			'''Triplanosporites'''	2	3.8835						'''Chloranthaceae'''	1	1.62837		'''Myrtophyllum'''	1	2.80767
			'''Verrucatosporites'''	2	3.8835						'''Cinnamomum'''	1	1.62837		'''Nilssonia'''	3	2.80767
											'''Cladophlebis'''	2	1.62837		'''Penosphyllum'''	1	2.80767
											'''Cornophyllum'''	1	1.62837		'''Rhamnaceae'''	1	2.80767
											'''Cyathea'''	2	1.62837		'''Sapindus'''	1	2.80767
											'''Davallia'''	2	1.62837		'''Trochodendrales'''	1	2.80767
											'''Dillenites'''	1	1.62837		'''Trochodendroides'''	1	2.80767
											'''Diospyros'''	1	1.62837		'''Zingiberopsis'''	1	2.80767
											'''Grewiopsis'''	1	1.62837		'''Ziziphoides'''	1	2.80767
											'''Laurales?'''	1	1.62837		'''Ziziphus'''	1	2.80767
											'''Magnifolia'''	1	1.62837
											'''Magnolia'''	1	1.62837
											'''Magnoliophyllum'''	1	1.62837
											'''Malvales'''	1	1.62837
											'''Marchantia'''	2	1.62837
											'''Menispermites'''	1	1.62837
											'''Nilssonia'''	3	1.62837
											'''Palmoxylon'''	1	1.62837
											'''Penosphyllum'''	1	1.62837
											'''Philodendron'''	1	1.62837
											'''Pterospermites'''	1	1.62837
											'''Rhamnaceae'''	1	1.62837
											'''Sarcandra'''	1	1.62837
											'''Trochodendrales'''	1	1.62837
											'''Zamia'''	3	1.62837
											'''Zamites'''	3	1.62837
											'''Zingiberopsis'''	1	1.62837
											'''Ziziphoides'''	1	1.62837
											'''Ziziphus'''	1	1.62837
											'''Zizyphoides'''	1	1.62837
	Upland Forest		'''Lycopodiumsporites'''	2	14.2552		'''Abietineaepollenites'''	3	12.5		'''Cissites'''	1	47.7612		'''Cissites'''	1	50
			'''Lycopodium'''	2	12.8297		'''Abietipites'''	3	12.5		'''Cissus'''	1	31.3433		'''Cissus'''	1	50
			'''Retitriletes'''	2	11.9743		'''Cedripites'''	3	12.5		'''Ampelopsis'''	1	20.8955
			'''Reticuloidosporites'''	2	9.62224		'''Lycopodiumsporites'''	2	12.5
			'''Abiespollenites'''	3	8.5531		'''Reticulatisporites'''	2	12.5
			'''Abietineaepollenites'''	3	8.5531		'''Reticuloidosporites'''	2	12.5
			'''Picea'''	3	8.5531		'''Retitriletes'''	2	12.5
			'''Piceaepollenites'''	3	8.5531		'''Rosannia'''	1	12.5
			'''Reticulatasporites'''	2	8.5531
			'''Rosannia'''	1	8.5531
	Wet or Successional		'''Alnus'''	1	15.9574		'''Nyssoidites'''	1	18.6528		'''Populus'''	1	16.2791		'''Populus'''	1	25
			'''Nyssapollenites'''	1	10.6383		'''Ericaceoipollenites'''	1	12.4352		'''Colutea'''	1	9.30233		'''Cyperacites'''	1	12.5
			'''Cupanieidites'''	1	9.57447		'''Cupanieidites'''	1	10.3627		'''Cyperacites'''	1	9.30233		'''Equisetum'''	2	12.5
			'''Alnipollenites'''	1	7.97872		'''Alnipollenites'''	1	7.77202		'''Equisetum'''	2	9.30233		'''Nyssidium'''	1	12.5
			'''Calamospora'''	2	7.97872		'''Salixipollenites'''	1	7.25389		'''Myrica'''	1	9.30233		'''Onoclea'''	2	12.5
			'''Engelhardtia'''	1	7.97872		'''Engelhardtioidites'''	1	6.21762		'''Nyssidium'''	1	9.30233		'''Porosia'''	1	12.5
			'''Ericaceoipollenites'''	1	7.97872		'''Ericipites'''	1	6.21762		'''Onoclea'''	2	9.30233		'''Taxodium'''	3	12.5
			'''Microreticulatisporites'''	2	7.97872		'''Gabonisporis'''	2	6.21762		'''Porosia'''	1	9.30233
			'''Nyssoidites'''	1	7.97872		'''Microreticulatisporites'''	2	6.21762		'''Sparganium'''	1	9.30233
			'''Sporopollis'''	1	7.97872		'''Mtchedlishvilia'''	1	6.21762		'''Taxodium'''	3	9.30233
			'''Styxpollenites'''	1	7.97872		'''Salix'''	1	6.21762
							'''Sporopollis'''	1	6.21762
